# Supplementary material
Source: PubMed Central journal article supplement (PMC3368237)
Supplement: NIHMS375926-supplement-09.pdf [file NIHMS375926-supplement-09.pdf]

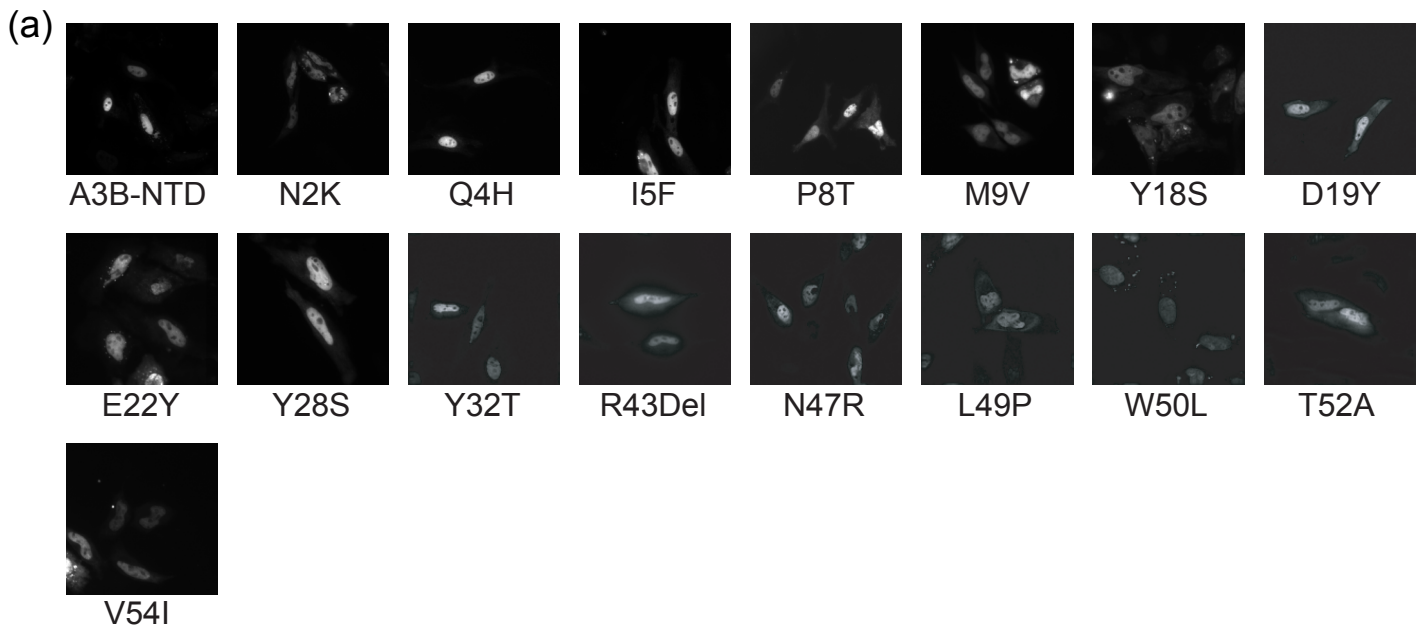

(b)

|     |            |            |            |            |            |            |
|-----|------------|------------|------------|------------|------------|------------|
| A3B | MNPQIRNPME | RMYRDTFYDN | FENEPILYGR | SYTWLCYEVK | IKRGRSNLLW | DTGVFRGQVY |
| A3G | MKPHFRNTVE | RMYRDTFSYN | FYNRPILSRR | NTVWLCYEVK | TK-GPSRPPL | DAKIFRGQVY |
| A3F | MKPHFRNTVE | RMYRDTFSYN | FYNRPILSRR | NTVWLCYEVK | TK-GPSRPRL | DAKIFRGQVY |
| AID | MDSLLMN--- | ---RRKFLYQ | FKNVRWAKGR | RETYLCYVVK | RRDSATSFSL | DFGYLR---- |
