# Supplementary material
Source: PubMed Central journal article supplement (PMC3368237)

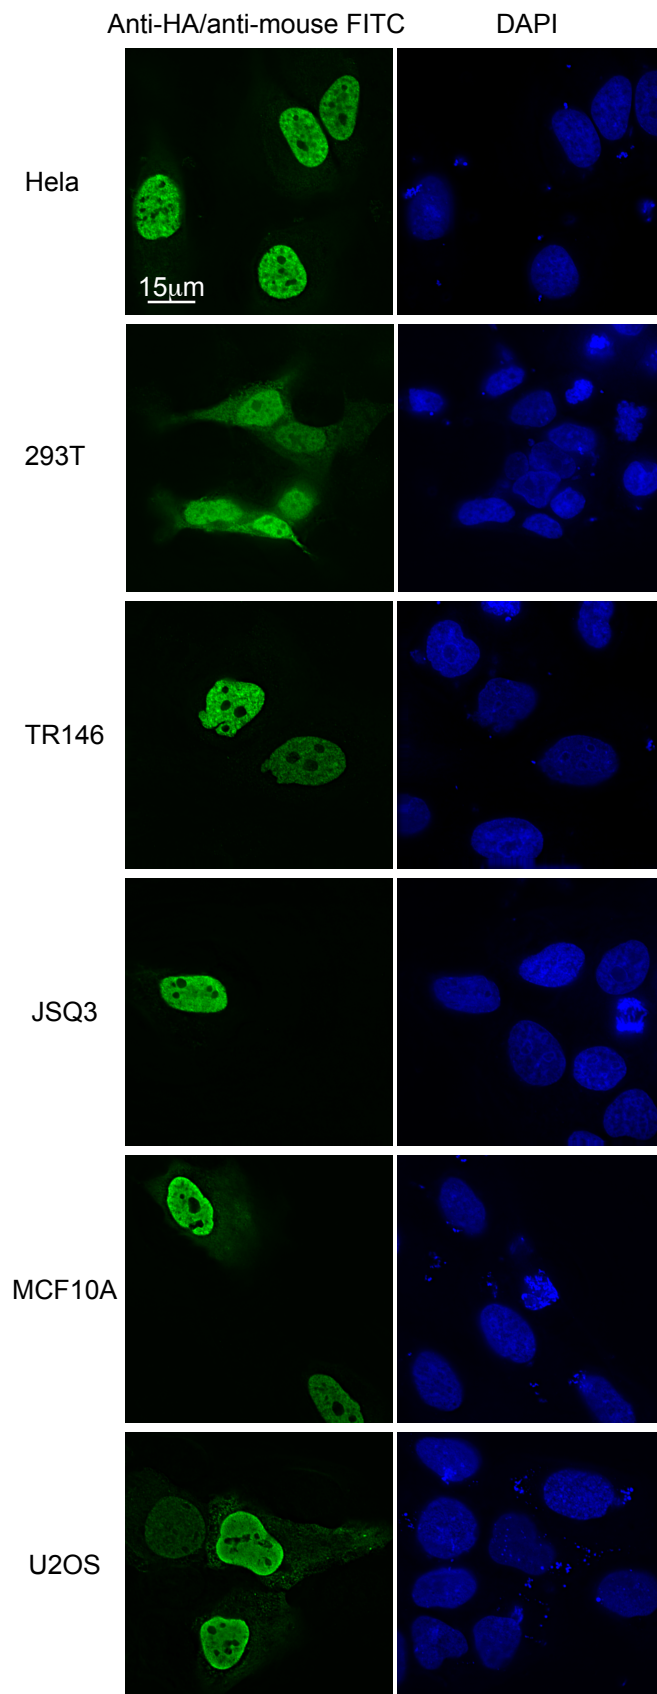

Supplement: NIHMS375926-supplement-01.pdf [file NIHMS375926-supplement-01.pdf]

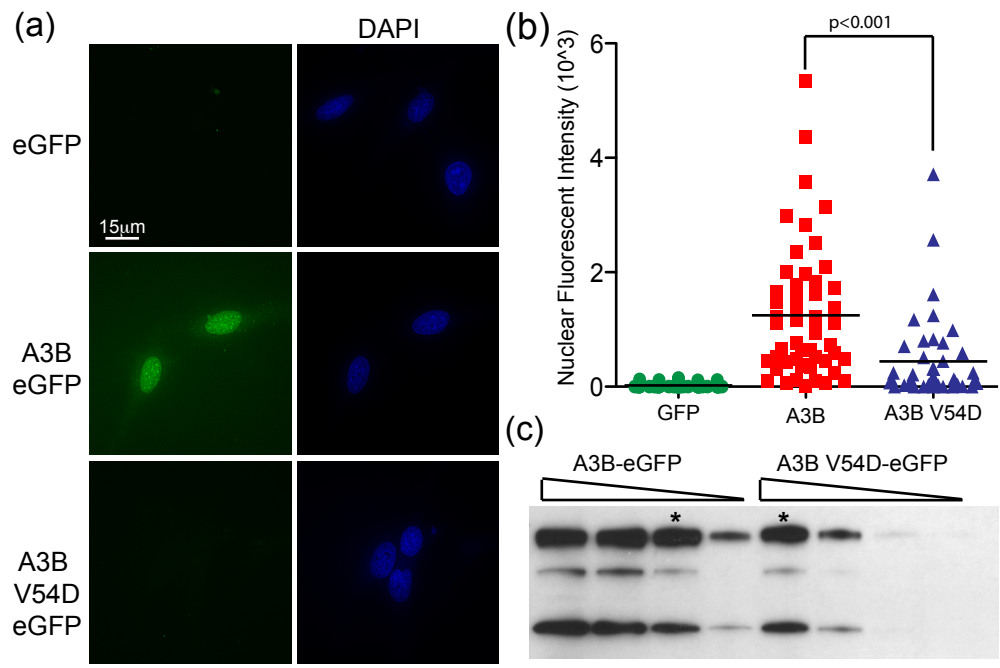

Supplement: NIHMS375926-supplement-10.pdf [file NIHMS375926-supplement-10.pdf]

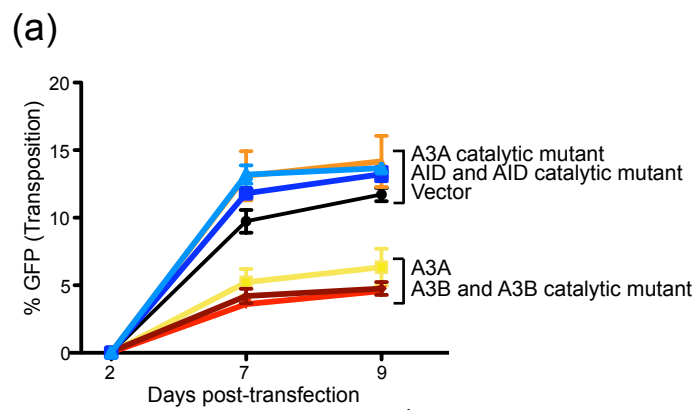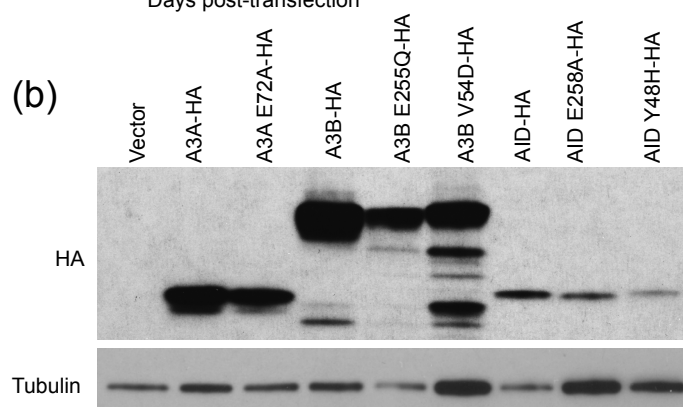

Supplement: NIHMS375926-supplement-11.pdf [file NIHMS375926-supplement-11.pdf]
